1 **Cryo-EM structure and functional landscape of an RNA polymerase ribozyme**

2

3

4

5

6

7

8 Ewan K.S. McRae<sup>1,3</sup>, Christopher J.K. Wan<sup>2,3</sup>, Emil L. Kristoffersen<sup>1,2</sup>, Kalinka Hansen<sup>1</sup>,

9 Edoardo Gianni<sup>2</sup>, Isaac Gallego<sup>2</sup>, Joseph F. Curran<sup>2</sup>, James Attwater<sup>2</sup>, Philipp

10 Holliger<sup>2,4</sup>, Ebbe S. Andersen<sup>1,4</sup>

11

12

13

14 <sup>1</sup>Interdisciplinary Nanoscience Center, Aarhus University, Aarhus, Denmark; <sup>2</sup>MRC

15 Laboratory of Molecular Biology, Francis Crick Avenue, Cambridge CB2 0QH, UK

16

17

18

19 \*Communication to: [ph1@mrc-lmb.cam.ac.uk](mailto:ph1@mrc-lmb.cam.ac.uk) & [esa@inano.au.dk](mailto:esa@inano.au.dk)

20

21 <sup>3</sup> these authors contributed equally to this work

22

23 <sup>4</sup> jointly supervised the work

24 **Abstract**

25

26 The emergence of an RNA molecule capable of replicating itself and other RNA  
27 sequences is a central pillar of hypotheses regarding the origin of life<sup>1,2</sup>. *In vitro*  
28 evolution has yielded polymerase ribozymes (PR) that can copy a range of RNA  
29 templates using nucleotide<sup>3-10</sup> or trinucleotide triphosphates (triplets)<sup>11</sup> as substrates  
30 and may give rise to a replicase activity. However, our understanding of PR function is  
31 encumbered by a lack of structural information beyond the progenitor class I ligase  
32 (cIL) ribozyme<sup>12-14</sup>. Here, we report the structure of the complete 5TU+t1 triplet  
33 polymerase ribozyme (TPR) apoenzyme and map its structure / function landscape.  
34 The TPR is an RNA heterodimer, comprising a catalytic (5TU) and a catalytically  
35 inactive (t1) subunit held together by two kissing loop interactions and its overall  
36 structure resembles a left hand with thumb and fingers at a 70° angle. While the 5TU  
37 subunit shows partial structural homology to the cIL, the t1 accessory subunit - despite  
38 sharing the same progenitor - exhibits a dramatically reorganized secondary and  
39 tertiary structure. Our combined structural and functional data suggest a model for  
40 templated RNA synthesis by the TPR holoenzyme and provide a foundation for a better  
41 understanding of RNA's potential for self-replication.

42 RNA catalysts (ribozymes) occupy central structural and catalytic roles in the function  
43 of modern cells including tRNA processing (RNaseP), mRNA splicing (spliceosome,  
44 group I / II self-splicing introns) and translation (ribosome peptidyl transferase center)<sup>15</sup>.  
45 In addition, a much wider variety of ribozyme activities not found in nature has been  
46 discovered by *in vitro* evolution, including polymerase ribozymes (PR) that are capable  
47 of synthesizing a complementary strand on an RNA template<sup>3-7,11</sup>. The capacity for  
48 RNA-catalyzed RNA-templated synthesis and replication is widely believed to have  
49 been a central pillar of the emergence of life's first genetic system and even life itself.

50 The earliest examples of nascent PR activity were found in self-splicing intron (SSI)  
51 ribozymes, in particular a variant of the *sunY* SSI ribozyme, which allowed single  
52 nucleotide triphosphate (NTP) extension<sup>16</sup> or the iterative ligation of RNA  
53 oligonucleotides on a complementary strand<sup>17</sup> including assembly of one of its subunits  
54 from RNA oligonucleotides<sup>18,19</sup>. The same *sunY* SSI ribozyme was also shown to  
55 incorporate short RNA trinucleotide substrates<sup>20</sup>, but with relatively low fidelity.

56 A more fully developed RNA polymerase activity emerged from derivatives of the  
57 class I ligase (cIL) ribozyme<sup>12,21</sup>, which after engineering and reselection could  
58 incorporate up to 14 NTPs in a template-dependent manner<sup>3</sup>. The polymerase activity  
59 of this first "true" PR was progressively improved by *in vitro* evolution to enable the  
60 synthesis of long RNAs (100-200 nts on some RNA templates)<sup>5,8</sup> as well as the  
61 synthesis of functional RNAs including a hammerhead ribozyme<sup>4</sup>, tRNA<sup>6</sup>, Broccoli  
62 fluorescent RNA aptamer<sup>11</sup> and the progenitor cIL ribozyme itself<sup>9</sup>. Recently, a variant  
63 utilizing trinucleotide triphosphates (triplets) as substrates (a triplet polymerase  
64 ribozyme (TPR)) emerged as a heterodimer from *in vitro* evolution<sup>11</sup>. This TPR  
65 displayed a remarkable ability to copy structured RNA templates including segments  
66 of its own sequence<sup>11</sup> as well as circular RNA templates by rolling circle synthesis<sup>22</sup>.

67 However, despite the above examples of PRs, there is no structural information  
68 available beyond the crystal structure of the cIL ribozyme<sup>13,14</sup>, the progenitor of the  
69 most advanced PRs including the TPR. While the cIL structure provided insights into  
70 the mechanism of phosphodiester bond formation and cIL interaction with the RNA  
71 substrate, it is unclear how and to what extent these features are retained in PRs,  
72 which diverge from the cIL not only by a number of mutations to the ribozyme core, but  
73 also by 5'- and 3'-extension sequences. A better understanding of how PRs perform  
74 accurate substrate selection, general RNA template interaction and templated RNA  
75 synthesis would therefore benefit from the structure of an active PR.

76 The structural challenge is defined by the highly dynamic nature and  
77 conformational malleability of large RNAs. Despite significant recent progress, in  
78 particular in cryogenic electron microscopy (cryo-EM) approaches to RNA structure

79 determination<sup>23,24</sup>, RNA-only structures have remained challenging targets for  
80 structure determination. In the case of the TPR, conformational heterogeneity may be  
81 further exacerbated by its origins: this ribozyme was evolved (and functions best) in  
82 the eutectic phase of water ice<sup>25</sup>, where subzero temperatures and high counterion  
83 concentrations present weak adaptive pressure for stable folding at ambient  
84 temperatures, potentially allowing for even more inherent structural dynamics and  
85 heterogeneity than RNAs derived from biology.

86 Leveraging RNA *in vitro* evolution (see below) as well as advances in RNA sample  
87 (see attached manuscript, McRae et al. 2022) and grid preparation<sup>26</sup> and image data  
88 processing<sup>27</sup>, we report the cryo-EM structure of the complete, heterodimeric TPR  
89 apoenzyme determined at its optimal functional magnesium concentration ( $[Mg^{2+}] =$   
90 100 mM), together with a comprehensive fitness landscape of TPR function. Our  
91 structure shows the molecular anatomy of the catalytic polymerase subunit, and  
92 reveals the nature and potential origin of its mutualistic association with the catalytically  
93 inactive accessory subunit to form the fully active heterodimeric ribozyme. Our data  
94 reveals structural and functional details not previously described and provides the  
95 foundation for a better understanding of TPR function.

96

### 97 ***Cryo-EM structure of optimized TPR heterodimer***

98 The heterodimeric TPR was evolved to use triplets as substrates (Fig. 1a). In order to  
99 improve activity and stability of the original t5+1 TPR<sup>11</sup>, we executed further rounds of  
100 *in vitro* evolution using an adaptation of a previously described tethered template  
101 selection scheme<sup>11</sup> (SI Fig. 1a). Starting from random mutant libraries of the catalytic  
102 t5 subunit, we carried out 8 rounds of selection for triplet polymerase activity with  
103 increasing stringency in the presence of a conserved t1 accessory subunit (see  
104 Methods). We identified two mutations in t5 ( $\Delta U38$  and C110U) and combined these  
105 with 3 more t5 mutations (U117C, U132C, U148A) discovered in separate selection  
106 experiments (to be described elsewhere) (SI Fig. 1b). The resulting t5 variant, 5TU (t5:  
107  $\Delta U38$ , C110U, U117C, U132C, U148A) exhibited superior triplet polymerase activity  
108 compared to t5 (SI Fig. 1c) and remained receptive to activity enhancement by the t1  
109 accessory subunit to copy longer templates (Fig. 1b).

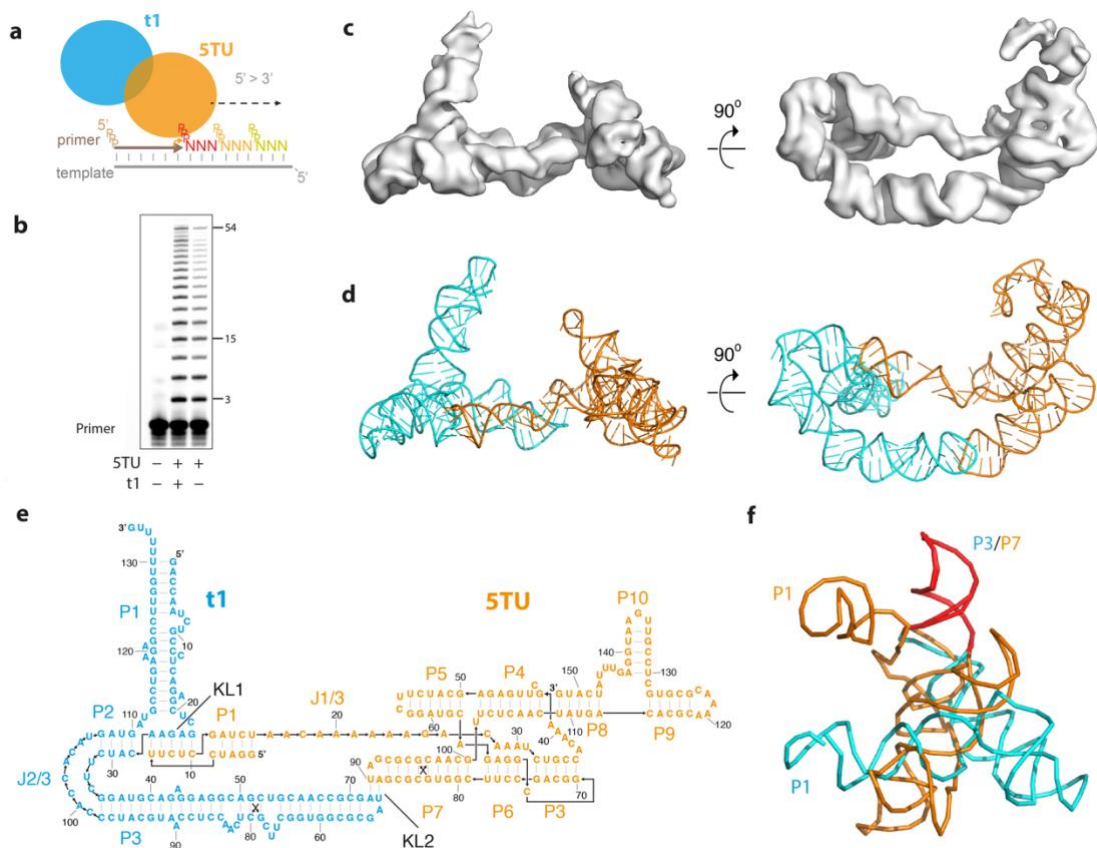

110

111 **Figure 1. Structure of the Triplet Polymerase Ribozyme (TPR).** (a) Schematics of  
 112 the 5TU+t1 heterodimer, template and triplet substrates. (b) Activity of 5TU alone or in  
 113 combination with t1 in copying a template encoding for (GAA)<sub>18</sub> after 15 hours. (c) Two  
 114 views of the cryo-EM reconstruction shown in grey. (d) Two views of the atomic model  
 115 for 5TU (orange) and for t1 (cyan). (e) The secondary structure diagram is shown for  
 116 5TU (orange) and for t1 (cyan). (f) Structural alignment of t1:P3 and 5TU:P7 stems  
 117 shows major structural difference between the two subunits.

118

119 Next, we sought to determine the structure of the TPR heterodimer 5TU+t1 in its  
 120 active form (at an optimal Mg<sup>2+</sup> concentration of 100 mM). Using cryo-EM, we were  
 121 able to reconstruct the full length 5TU+t1 RNA heterodimer complex to a global  
 122 resolution of 5.9 Å (Fig. 1c and SI Fig. 2,3). The cryo-EM map allows for unambiguous  
 123 placement of all double helices (P) based on the secondary structure predictions of  
 124 5TU and t1 (SI Fig. 4,5) and *de novo* assembly of the remaining joining (J) and loop  
 125 (L) regions using DRRAFTER<sup>24</sup> (SI Fig. 6). The final model of the heterodimer was  
 126 refined using molecular dynamics and energy minimizations (see Methods) and  
 127 reached a map-to-model cross correlation of 8.3 Å at FSC=0.5 and 6.6 Å at FSC=0.143  
 128 (SI Fig. 7). At the global resolution of 5.9 Å, the data support the overall conformation  
 129 of the RNA backbone, whereas exact base positions are the result of geometrical  
 130 refinement and energy minimizations. 3D variability analysis revealed intra- and  
 131 interdomain flexibility, which could explain why we were not able to obtain higher  
 132 resolution (SI Fig. 8, SI Movie 1). Further support of the structural model was gained

133 by an independently determined low resolution (8 Å) map of the progenitor t5+1  
134 ribozyme<sup>11</sup> at lower Mg<sup>2+</sup> concentrations (SI Fig. 9).

135 The model revealed the overall structural anatomy of the TPR to resemble an  
136 upturned left hand, with the thumb formed by the t1 and fingers formed by the 5TU  
137 subunit at an approximate angle of 70°, with the palm formed by a bipartite interaction  
138 of the subunits through two distinct kissing loops (KL1, KL2). The model can be  
139 rationalized in a secondary structure diagram that shows helical stacking, pseudoknots  
140 and interaction sites (Fig. 1e). The 5TU subunit comprises the catalytic core domains  
141 P3-7, the template binding strand J1/3, and peripheral domains P1+P8-10. In contrast,  
142 the non-catalytic accessory subunit t1 adopts an extended secondary structure that  
143 contains only three main hairpin domains P1-3. Although both 5TU and t1 subunits are  
144 derived from the same starting sequence by *in vitro* evolution (with their core  
145 sequences diverging only by 7 mutations (SI Fig. 5a)), their secondary and tertiary  
146 structures have diverged radically with only a 22-bp segment of the t1:P3 hairpin  
147 domain retaining its original structure (5TU:P7) (Fig. 1f, SI Fig. 10).

148

#### 149 ***Functional landscape of the TPR heterodimer***

150 Next, in order to obtain information on the functional importance of the structural  
151 features observed in our model of the TPR heterodimer, we performed a  
152 comprehensive fitness landscape<sup>28,29</sup> analysis (Methods, Fig. 2 and SI Figs 11-16, SI  
153 Movie 2). Mutant libraries of 5TU and t1 with mutation rates of 3% per position (1% of  
154 each alternative base) were bottle-necked to about 10<sup>6</sup> members and subjected to one  
155 round of purifying activity selection (in triplicate), whereby only TPR mutants capable  
156 of successfully copying a given RNA template were recovered. Pre- and post-selection  
157 libraries were sequenced and changes in genotype abundance were quantified; we  
158 define ribozyme “fitness” as the log-transformed enrichment of a given genotype  
159 relative to the wild-type 5TU or t1 sequence. After filtering, we obtained the relative  
160 fitness of 128,708 ribozyme variants, comprising 79,702 5TU and 49,006 t1 genotypes,  
161 providing fitness estimates of all point mutants in t1, as well as 99.6% of all point  
162 mutants in 5TU. For both subunits, calculated fitness was strongly correlated across  
163 replicates (Pearson coefficient R= 0.89 (5TU) / 0.95 (t1), and R = 0.97 (5TU) / 0.95 (t1)  
164 if only single and double mutants are considered) (Fig. 2a, SI Fig. 11b). To our  
165 knowledge, this presents the first, comprehensive genotype / phenotype correlation  
166 dataset for a large, complex ribozyme.

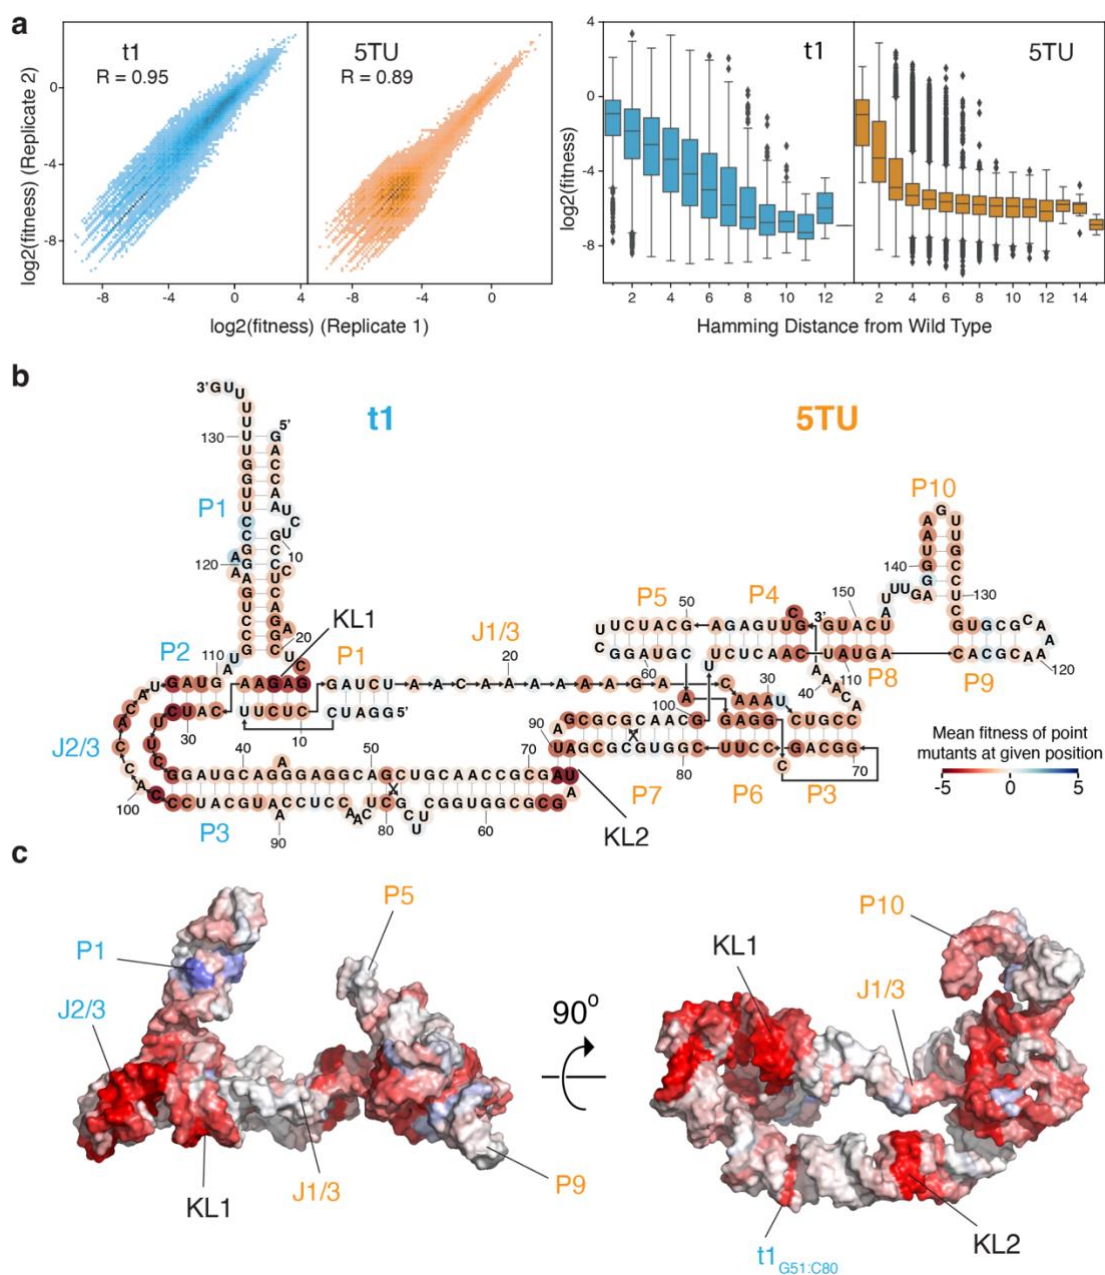

167

168 **Figure 2. Fitness landscape of the TPR.** (a) Reproducibility of fitness values between  
 169 two replicates of t1 (cyan) and 5TU (orange) (for other replicates see SI Fig. 11), and  
 170 fitness values as a function of Hamming mutational distance for t1 (cyan) and 5TU  
 171 (orange) ( $n=3$ ). (b,c) Average fitness values for a given nucleotide position in TPR  
 172 secondary structure (b) and tertiary structure (c) (see SI Movie 2).  
 173

174 Next, we analysed the dataset for global properties and concordance with  
 175 established TPR function (Fig. 2a). While mean fitness of both 5TU and t1 mutants  
 176 was negatively correlated with Hamming distance from wild-type (wt) sequences (Fig.  
 177 2a), the fitness decline was noticeably steeper for 5TU than in t1. Furthermore, while  
 178 the majority of 5TU genotypes showed a much-reduced fitness compared to wt, the t1  
 179 fitness distribution - while also negatively skewed - was considerably flatter (SI Fig.  
 180 11a). These results are consistent with the highly-evolved catalytic 5TU subunit

181 occupying a steeper fitness peak (in a more rugged adaptive landscape) compared to  
182 the more recently evolved t1 accessory subunit. Fitness landscape analysis  
183 furthermore revealed the functional relevance of both known structural features of  
184 functional importance in cIL<sup>13</sup> and novel structural features that are unique to the TPR  
185 (Fig. 2b,c, SI Fig. 12). Known structural features include: the template-binding  
186 nucleotides in J1/3 (positions 23-24), the active site cytidine in P4 (position 43), and  
187 the P6 triple helix-forming adenosines (positions 28-30). Novel features of importance  
188 to TPR function include: the P10 stem (positions 137-140), the kissing-loop  
189 interactions (KL1 and KL2) between the two subunits, as well as the internal loop  
190 region of t1:J2/3,J3/2 (positions 99-106, 32-34) and a G-C base pair (bp) in t1:P3  
191 (position 51 and 80). These will be discussed below in relation to the structural analysis.

192 In addition to the near complete set of all possible TPR single mutations, our data  
193 also contained a large number of double and higher-order mutations, enabling analysis  
194 of their interactions (epistasis). Analyzing double mutants, we found that significant  
195 epistatic interactions in both 5TU and t1 were negatively biased (SI Fig. 13, 14) and  
196 rarer in t1 than in 5TU. Moreover, as the distance between residues increased (as  
197 calculated from our structural model of the apoenzyme), both the proportion of  
198 significant epistatic interactions and the magnitude of epistasis, decreased in both  
199 subunits (SI Fig. 15b). Finally, we found that the average epistatic value decreased as  
200 the fitness of the first point mutation increased in double mutants of both 5TU and t1  
201 (SI Fig. 15a). All of these trends are consistent with previously determined fitness  
202 landscapes of a yeast tRNA<sup>30</sup>, and snoRNA<sup>31</sup>, suggesting that they may represent  
203 general features of RNA evolution.

204 Although our dataset does not comprehensively capture all double mutants in  
205 either ribozyme subunits, we nonetheless found a large number of double mutants at  
206 base-pairing positions which exhibit positive epistasis, particularly within t1 lending  
207 support to our structural model (SI Fig. 16a). Moreover, at base-pairing positions  
208 predicted by our secondary structure models of 5TU and t1, point mutations that result  
209 in a wobble base pair were consistently higher in fitness compared to base pair-  
210 disrupting point mutations (SI Fig. 16b). Finally, our data also revealed striking  
211 differences in the respective mutational tolerance of the two subunits (SI Fig. 11a).  
212 Even though 5TU and t1 share large stretches of identical sequence within their core  
213 domains (SI Fig. 5), they are evidently subject to very different selective pressures with  
214 5TU much nearer to a fitness peak than t1, and epistasis governing 5TU evolution to  
215 a stronger extent than t1 (SI Fig. 13,14).

216  
217



## 218 **Dual dimerization pre-organizes template-binding site**

219 Having validated our structure model and a functional sequence map, we sought a  
220 better understanding of the structural elements that support RNA synthesis by the TPR.  
221 The most striking feature is that the two divergent subunits are connected through two  
222 distinct kissing loop (KL1, KL2) interactions (Fig. 3a). KL1 tethers the long single-  
223 stranded segment of 5TU:J1/3 by forming a 5-bp interaction between the loop of the  
224 5TU:P1 hairpin and the t1:J1/2 region, which stacks coaxially with t1:P2 (Fig. 3b,c) –  
225 reminiscent of a branched KL<sup>32</sup>. One of two nucleotides connecting P1 and the KL1  
226 domain, t1:C22, has no obvious base pairing partner, though displays a strong effect  
227 on fitness of the TPR (SI Fig. 12a). Just before KL1, 5TU:G11 remains base stacked  
228 within the 5TU:P1 cap helix with a distinct lack of signal in our EM-map where its  
229 predicted base pairing partner, 5TU:C5, is expected to be (SI Fig. 17a). Instead,  
230 5TU:C5 appears to be flipped out and stacking with t1:C22, stabilizing the base of the  
231 t1:P1 helix (SI Fig. 17b).

232 The other KL interaction (KL2) forms a second contact point between the two  
233 subunits, a 2-bp loop-loop interaction between the apical loops of 5TU:P7 and t1:P3  
234 (Fig. 3d,e) and by its geometry enforces a rigid, extended conformation of the single  
235 stranded 5TU:J1/3 segment clearly visible in electron density in both our structures  
236 (Fig. 1c, SI Fig. 9). The stretching and spatial orientation of the 5TU:J1/3 could be  
237 important for template recognition and orientation in the active site. Similar KL  
238 interactions have previously been observed in the structures of dimeric ribozymes  
239 (Varkud), riboswitches (glycine riboswitch) and retroviral RNA genome dimerization  
240 (HIV-1, MoMuLV) (reviewed in <sup>33</sup>). Indeed, the MoMuLV structure was so strikingly  
241 similar to the TPR KL2 that it could be inserted directly into our EM map and used as  
242 a starting point for modelling. Importantly, heterodimer formation is essential for full  
243 triplet polymerase activity (Fig. 1b) and primer/template interaction enabling RNA  
244 synthesis activity without template tethering, which is obligatory for most other  
245 polymerase ribozymes<sup>4</sup>.

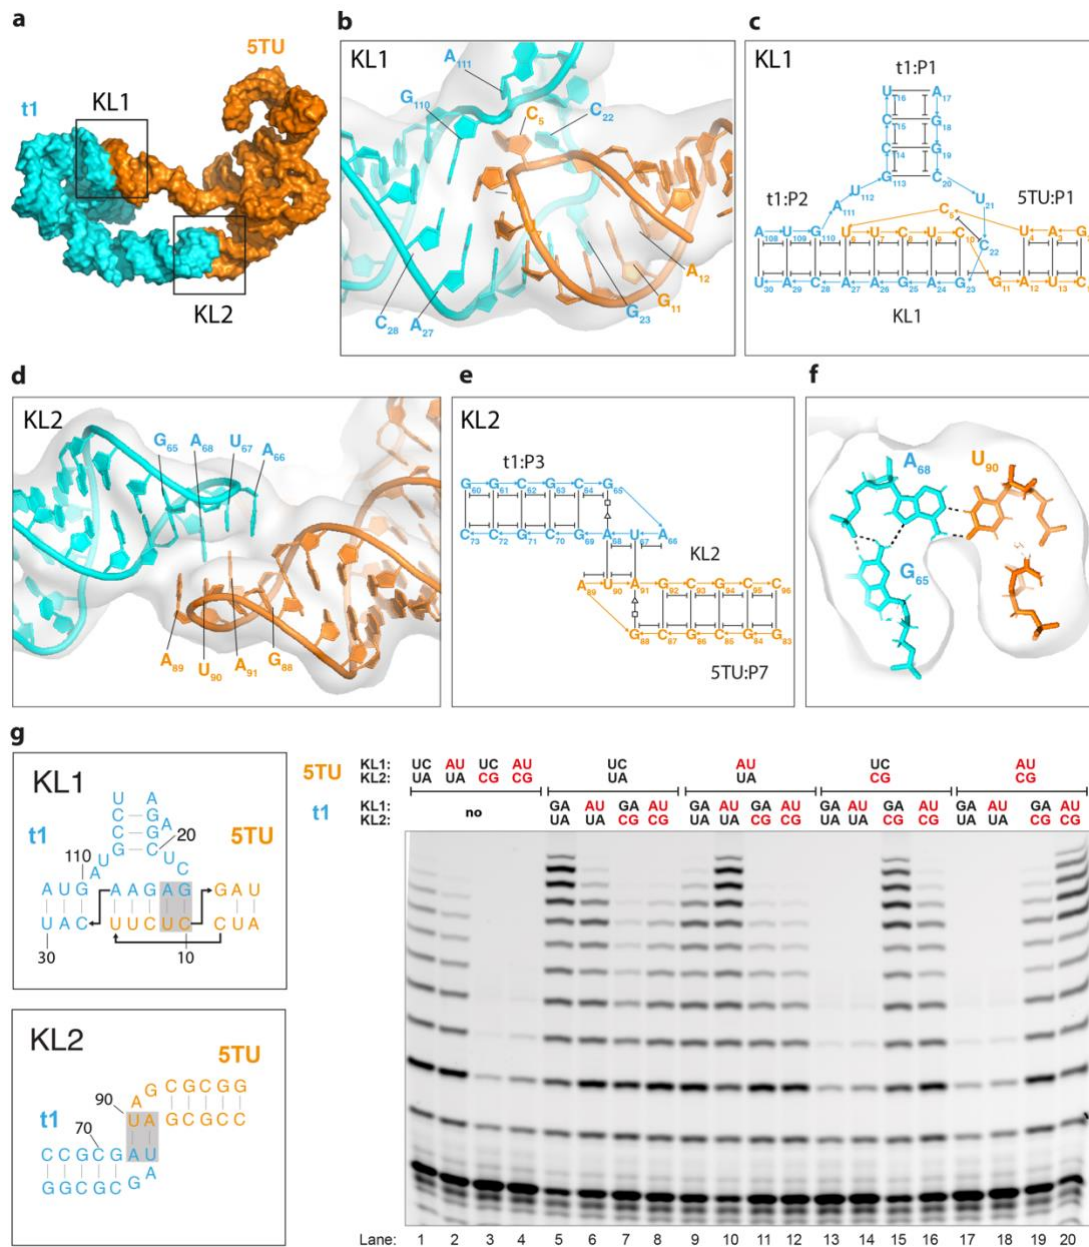

246  
247  
248  
249  
250  
251  
252  
253  
254  
255  
256  
257  
258  
259  
260

**Figure 3. Kissing loop structure and interaction.** (a) Model of TPR with 5TU in orange and t1 in cyan. KL1 and KL2 indicated by boxes. (b) Tertiary structure of KL1 with 5TU coloured orange and t1 coloured cyan and the EM volume as a transparent grey surface. (c) Structure diagram of KL1 showing base pairs (lines) and stacks (capped lines). (d) Tertiary structure of KL2 with 5TU coloured orange and t1 coloured cyan and the EM volume as a transparent grey surface. (e) Structure diagram of KL2 showing base pairs (lines) and stacks (capped lines). (f) Structural detail of KL2 showing triple base pair interaction of G65. (g) TPR primer extension activity of wild-type as well as mutant KL sequences. Left shows KL1 and KL2 mutations. Right shows primer extension gel electrophoresis, where mutation of 5TU KL1 and in particular KL2 reduce TPR activity, but activity can be restored by compensating mutations in cognate loops in t1.

261 Fitness landscape analysis provides clear evidence for the functional importance  
262 of the KL interaction (Fig. 2, SI Fig. 12). For example, KL1 base pairing between  
263 5TU:U7-C10 and t1:G23-A26 shows a clear functional signal, since mutation in these  
264 regions are detrimental, and provides evidence of base pairing, since mutations to the  
265 wobble GU is less severe (SI Fig. 18a). As a direct consequence of the shared  
266 evolutionary ancestry between 5TU and t1, KL2 is composed of identical sequence  
267 GAUA between the terminal loops of 5TU:P7 and t1:P3 (SI Fig. 10). Correspondingly,  
268 the fitness of 5TU and t1 point mutants in the two loops are virtually identical (SI Fig.  
269 18b). Besides the two inter-strand base-pairing residues, 5TU:C87-G88 and t1:C64-  
270 G65 also appear to be very sensitive to mutation. This pattern is consistent with the  
271 GAUA KL of the TPR structure and the GACG KL of the MoMuLV NMR structure<sup>34</sup>. In  
272 both cases the first G of the tetra loop forms a non-Watson-Crick bp with the purine  
273 involved in the inter-strand bp (Fig. 3f), and stacks on the previous pyrimidine base,  
274 which according to the fitness data can accommodate a wobble bp. 5TU:G92-C93 and  
275 t1:G69-C70 are sensitive to purine mutations, which can also be explained by the  
276 structural models that show the stacked 5TU:A89 and t1:A66 has a cross strand  
277 interaction with the phosphate backbone in this region.

278 Next, we sought to probe KL contribution to TPR activity by targeted mutation (Fig.  
279 3g). While the activity of 5TU both in the absence and presence of t1 was severely  
280 affected by a double mutation in the KL2 core (5TU:U90C,A91G) (lane 3 and 13), a  
281 KL1 double mutant (5TU:U9A,C10U) only modestly impacted activity (lane 2 and 9),  
282 maybe due to the remaining base-pairing interactions in KL1. Nevertheless, in both  
283 cases (including KL1,2 double mutants), compensatory mutations in t1 KL1  
284 (t1:G23A,A24U) and t1 KL2 (t1:U67C,A68G) restored TPR activity to “wild-type” levels  
285 (Fig. 3g, lane 10, 15, 20), showing 1) the importance of the KL1 / 2 interactions  
286 irrespective of the precise sequence and 2) confirming the importance of the central  
287 two base-pairs, in particular in KL2, in stabilizing the fully active TPR heterodimer  
288 configuration.

289  
290

### **Conserved and extended features of 5TU**

291 Despite of several mutations and unique 5' and 3' extensions, the catalytic core of the  
292 5TU subunit retains close resemblance to the original cIL structure (Fig. 4a,b, SI Fig.  
293 19). Indeed, the fitness landscape analysis revealed a low tolerance for mutation in  
294 congruence with hallmark features of the cIL function (Fig. 2, SI Fig. 12) including key  
295 tertiary interactions that form the putative active site (Fig. 4b,c)<sup>13,14</sup>. The overall  
296 arrangement of the two coaxially stacked helix segments, P5-P4 and P7-P6-P3, that  
297 serve as a scaffold for the active site, is preserved in the absence of the cIL:P1-P2

298 substrate helix. However, the 5TU EM map suggests that the two main connections  
 299 (J3/4 and J5/6,J7/4) between the two helix segments are different from those found in  
 300 cIL.  
 301

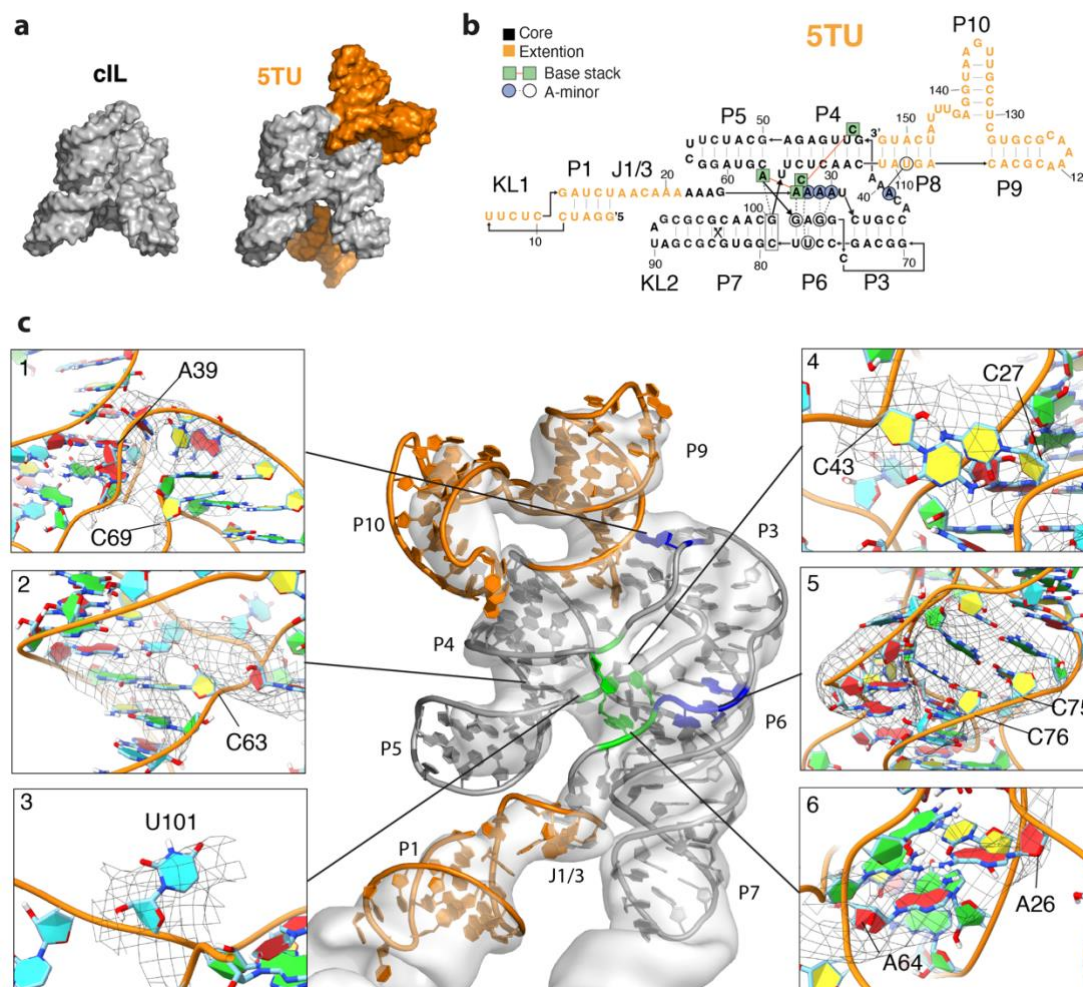

302

303 **Figure 4. Structural features of 5TU.** (a) Comparison of class I ligase (cIL) and 5TU,  
 304 where the core domain is grey and extension domains of 5TU are orange. (b)  
 305 Secondary structure model of 5TU showing core domain (black), extension domains  
 306 (orange), active site base stacks (green boxes) and A-minor motifs (blue/white circles).  
 307 (c) 5TU subunit model shown in cryo-EM map coloured similar to b. Detailed views of  
 308 core nucleotides with EM map shown as a mesh selectively 3 Angstrom around the  
 309 residues of interest: (1) J3/4 with C69, (2) unpaired C63, (3) flipped out U101, (4) C27-  
 310 C43 base stack, (5) the P6 triple helix, (6) A26-A64 base stack. Refined model is  
 311 shown with a ribbon cartoon backbone and bases coloured by identity (Yellow -  
 312 Cytosine, Green - Guanine, Red - Adenine, Cyan - Uracil).  
 313  
 314

315 In the cIL, J3/4 formed a hairpin cap at the end of P3 and, with one bridging G,  
 316 entered P4 (SI Fig. 19a). The sequence of J3/4 in 5TU is different, and DRRAFTER  
 317 modelling of this junction shows that J3/4 appears to insert into the minor/shallow  
 318 groove of the P8 helix of the new 5TU accessory domain (Fig. 4c, panel 1). While the

319 cIL has a GU base stack (cIL:G45,U76) between J3/4 and J6/3 important for  
320 connecting the top of the tripod, this was not predicted by our DRRAFTER model,  
321 where instead the corresponding nucleotides in TPR (A41 and C69) are relatively  
322 distant, and were further not severely affected by point mutations (Fig. 2). Out of the  
323 entire 5TU:J3/4 only A39 is functionally conserved and our strand path places it near  
324 the minor groove of 5TU:P8, hinting that it could form an A-minor type interaction with  
325 the proximal U111:A150 bp – thus substituting the function of the GU base stack.

326 In 5TU the antiparallel crossover of J5/6 and J7/4 differs from cIL by a A50G  
327 mutation in P4, which provides a base pairing partner for C63. However, mutation to  
328 C63 is well tolerated (Fig. 2, SI Fig. 12), and although C63 is shown as base paired in  
329 our energy minimized model, the EM map has a conspicuous absence of signal at this  
330 residue (Fig. 4c, panel 2), which suggests that C63 is unpaired as in cIL. 5TU also has  
331 an unpaired nucleotide, U101, between P7 and P4 at the crossover junction that is  
332 base-paired in the cIL ribozyme<sup>13</sup>. We found U101 to be tolerant of mutation to any  
333 other residue (SI Fig. 12), and the EM map shows weak signal that can fit a flipped-  
334 out nucleotide in this location (Fig. 4c, panel 3), indicating that the base does not form  
335 any key interactions. Despite of the differences of J3/4 and J5/6,J7/4 in 5TU and cIL,  
336 the spacing between the connection sites is similar, which indicates that the overall  
337 conformation of the core domain is preserved to serve as a scaffold for the active site.

338 The key tertiary interactions that form the putative active site (Fig. 4b,c) are  
339 supported by the EM map, DRRAFTER modelling and fitness data. The core triple  
340 helix region composed of P6 and the A-minor triad (A28-A30) is observed in our EM  
341 map (Fig. 4c, panel 5) and was modelled by DRRAFTER. The fitness data show that  
342 A67 and U77 of P6 are highly sensitive to mutation, as they directly contact A28-A30.  
343 Additionally, A-minor interactions of A26 and A64 with P6 and P7 are similarly sensitive  
344 to mutation. In contrast, C75, C76 and U78 of P6 that are not involved in A-minor  
345 interactions are less sensitive; in fact, both C75U, C76U and U78C are as functional  
346 as wild-type, presumably because they preserve the helical structure by allowing  
347 wobble pairing. The A26:A64 and C27:C43 stacks from the putative active site are also  
348 apparent in our EM map (Fig. 4c, panel 4,6), where A64 and C43 are more sensitive  
349 to mutation than the A26 and C27 nucleotides, but mutation to any of these is  
350 detrimental to fitness.

351 Of the domains unique to 5TU, P8 and P9 extends the coaxial stack of P5-P4,  
352 while P10 projects from the side of the helix and bends towards the active site (Fig.  
353 4c). P10 is considerably less tolerant to mutations compared to P9 (or P5 and P7) (Fig.  
354 2, SI Fig. 12), consistent with the hypothesis that P10 (formerly termed “epsilon”  
355 domain<sup>11</sup>) may mediate interactions with the incoming trinucleotide triphosphate

356 (triplet), while P9 and P5 point away from the active site and, likely, have little  
357 involvement in interacting with the primer/template duplex or triplet substrate.

358

### 359 **Structural features of the scaffolding t1 subunit**

360 To understand how 5TU interactions with t1 enabled full TPR activity, we investigated  
361 the structure of the t1 accessory subunit. The t1 subunit adopts a unique tripod-like  
362 structure (Fig. 5a): The t1:P2 and t1:P3 form two parallel legs connected by a U-turn  
363 motif formed by the J2/3 and J3/2 joining regions. The t1:P2 leg is extended by coaxial  
364 stacking by KL1 and 5TU:P1 leading into the single stranded 5TU:J1/3. The third leg  
365 is formed by t1:P1, which is connected to the other two helices by the branched KL1  
366 to t1:P2 and by an A-bulge tertiary contact to P3. The P3 helix forms a long stem with  
367 a characteristic 120° bend and connects rigidly to 5TU by KL2. Our t1 structure model  
368 is furthermore supported by fitness landscape and epistasis analysis of both standard  
369 and non-canonical base pairs and stacks (Fig. 5b).

370 The U-turn of J2/3 and J3/2 is a tertiary motif with several non-Watson-Crick base  
371 pairs and stacking interactions (Fig. 5c). The J2/3 and the terminal regions of P2 and  
372 P3 that lead into J2/3, are highly sensitive to mutation, supporting the idea that these  
373 interactions may be important for t1 folding and function (Fig. 2, SI Fig. 12). Indeed, a  
374 clear trend observed in the fitness landscape is the strong conservation of the  
375 pyrimidine tracts on the outside edge of the helices leading into the junction (t1: U30-  
376 C34, U96-C99) (marked in yellow in Fig. 5d). These result in a narrowing of the shallow  
377 groove and a bending of the outside (5'-3') strands towards each other. Further  
378 narrowing the helix at the junction appears to be caused by the presence of two non-  
379 canonical pyrimidine-pyrimidine base pairs t1:C34,C99 and t1:U32,U106. Interestingly,  
380 t1:C34,C99, which sit at the apex of the turn and the last bp in P3 (Fig. 5d, panel 1),  
381 are two of the most invariant nucleotides in the structure with mutation of either to a G  
382 being highly deleterious (SI Fig. 12). In contrast, t1:U32,U106 in P2 are both more  
383 tolerant to mutation as long as they maintain the outer pyrimidine tract is maintained  
384 (i.e. mutation of U106A and U32C are neutral, while U32A is deleterious) (SI Fig. 12).  
385 Both P2 and P3 helices have a moderate preference for adenines (A103 and A100,  
386 respectively) that stack on the end of the helices and the unpaired nucleotides C101  
387 and C104 of J3/2 also have a strong pyrimidine bias (SI Fig. 12).

388 The t1:P3 helix is interrupted by a noncanonical G42,A91 base pair and a A43,A90  
389 double bulge (Fig. 5d). The connectivity in our EM-map between t1:P1 and this region  
390 in t1:P3 remains until high contour levels, suggestive of a tertiary interaction (Fig. 5d,  
391 panel 2). In our model, the A43,A90 double bulge is positioned appropriately to allow  
392 the unpaired t1:A18 from the t1:P1 helix to flip out and insert into the bulge, stacking

393 between A43 and A91 (Fig. 5d). This presumed A18,A43 stacking interaction is  
394 furthermore supported by fitness landscape analysis as both A18C and A43U  
395 mutations are individually deleterious, but jointly restore fitness. The A-bulge is placed  
396 approximately one helical turn from the J2/3 crossover of the U-turn and are likely  
397 cooperative interactions that reinforce this unique conformation.

398 The P3 helix also contains two asymmetric 4-nt bulges, t1:C49,C82-A84 and  
399 t1:C53-U55,U78 (Fig. 5e), that are clearly visible in the EM map as distinct holes in the  
400 helix region (Fig. 5f, panel 1 and 2). The first bulge is modelled as a bifurcated bp  
401 where C49 H-bonds with both C82 and A84 resulting in a 60-degree bend. The second  
402 bulge is modelled as a bifurcated bp where U78 H-bonds with both C53 and U54  
403 resulting in a 60-degree bend. Being placed with a spacing of a half turn the two bulges  
404 together result in a 120-degree bend of the helix. Mutations in these bulges does not  
405 appear to affect fitness to a large degree indicating that the asymmetry of the bulge  
406 with 1 nt across from 3 others are most important for maintaining the shape. However,  
407 the G51,C80 bp between the two bulges is highly sensitive to all mutations, except  
408 C80U, which would enable a G51,U80 wobble pair. Moreover, the G51C / C80G  
409 genotype is one of the strongest positive epistatic interactions within t1 double mutants.  
410 These data suggest that this bp may act as a crucial “clamp” between the t1:C49,C82-  
411 A84 and t1:U78,C53-U55 bulges to stabilize the structure and geometry of t1:P3 with  
412 respect to KL2.

413

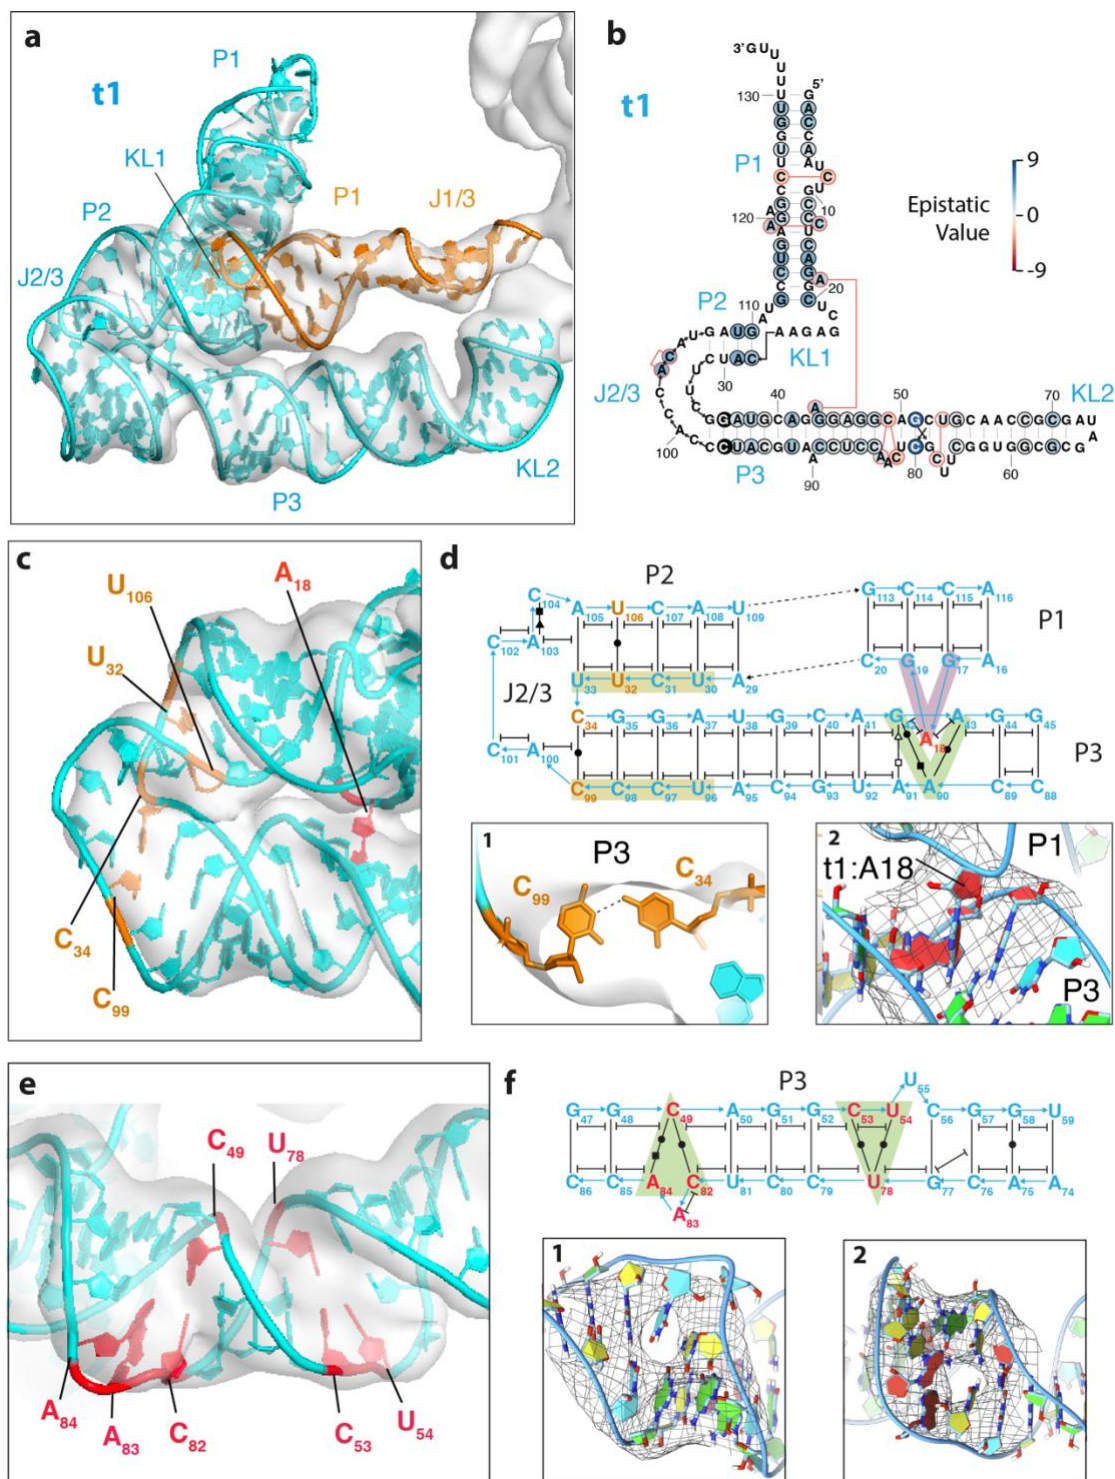

414

415 **Figure 5. Structural features of t1.** (a) EM map with t1 model (cyan) and 5TU:P1 and  
 416 J1/3 (orange). (b) Epistasis of standard and non-canonical base pairs shown on  
 417 secondary structure of t1. (c) U-turn motif of J3/2 highlighting the noncanonical C-C  
 418 and U-U base pairs and A minor insertion motif between the t1:P1 and t1:P3 adenines.  
 419 (d) Secondary structure diagram showing base pairs and stacks of U-turn and A-  
 420 insertion motifs. Panel 1 shows UU bp. Panel 2 shows A-insertion motif. (e) Bulged  
 421 regions of t1:P3. (f) Secondary structure diagram showing base pairs and stacks of  
 422 120-degree turn. Panel 1 and 2 shows observed gaps in the helical density.  
 423



424 The EM map of the t1:P1 stem is the least resolved region of the TPR structure,  
425 but its general base paired structure and bulges are supported by epistatic base  
426 changes (Fig. 5b). The low resolution of this region could be due to dynamics of t1:P1.  
427 3D variability analysis suggests a continuous distribution of particles amongst our data  
428 that appear to represent dynamic movements within the TPR. We have attempted to  
429 reconstructed volumes using the particles from the tailing and leading edges of this  
430 distribution, which suggest the major movement is in the t1:P1 helix and the 5TU:P4  
431 helix, with minor distortions observed elsewhere in the structure (SI Fig. 8). The t1:P1  
432 helix appears to be supported at its base by two key tertiary interactions (the KL1 and  
433 A-bulge) that form a hinge allowing the large dynamic movement of t1:P1 (SI Movie 1).  
434 Because of the orientation of the hinge, the movement of the t1:P1 is in the direction  
435 of the 5TU active site. Based on the structural analysis we provide a full map of  
436 secondary and tertiary contacts within TPR (SI Fig. 20).

437

#### 438 ***Model of the TPR holoenzyme***

439 To further investigate the functional properties and build a model of templated RNA  
440 synthesis by the TPR holoenzyme, the catalytic 5TU subunit was first aligned to the  
441 cIL ribozyme crystal structure<sup>13</sup>. Comparison of 5TU to the cIL structure reveals that  
442 the active site and helices P3-P7 retain similar positioning relative to one another and  
443 even the placement of the long single stranded J1/3 appears conserved in the 5TU+t1  
444 apoenzyme despite the loss of the intramolecular loop to the template helices cIL:P1-  
445 2 (see SI Fig. 19). Indeed, when only the P1 & P2 helices are removed from cIL, the  
446 structure fits in our 5TU cryo-EM map with a correlation coefficient of 0.8. We therefore  
447 built a model of the holoenzyme by aligning an elongated template-product helix to the  
448 P1 substrate helix in the cIL structure (Fig. 6a, SI Fig. 21,22). Remarkably, this simple  
449 model allows placement of the primer-template duplex and triplet substrate 5' end in  
450 close proximity to features of the 5TU subunit known to interact with them, such as J1-  
451 3 segment, the active site, and the P10 domain (see below).

452 A notable feature of the TPR observed previously is its fidelity of 97% (per  
453 nucleotide position)<sup>11</sup>, which is significantly higher than would be expected based on  
454 simple triplet binding thermodynamics. A significant contribution was ascribed to the  
455 P10 (formerly epsilon) domain that appears to enhance fidelity from the baseline 92%  
456 of a  $\Delta$ P10 TPR<sup>11</sup>. Single atom replacement studies in the substrate triplet indicated  
457 that this fidelity boost likely relies on H-bonding with the shallow (minor) groove of the  
458 3' base of the incoming triplet. More recent, functional data suggests, that the P10  
459 domain may make even more extensive interactions. When only a single triplet is  
460 bound to the template 3' of the ligation junction, the P10 fidelity boost is lost but

461 regained in the presence of a second downstream triplet. However, in the absence of  
462 a downstream triplet, but using substrates of increasing length, P10-dependent fidelity  
463 gains are almost entirely restored when using a quadruplet (pppN<sub>4</sub>) substrate,  
464 mimicking a duplex at only the first position of the downstream triplet, with minimal  
465 further fidelity increases seen upon incorporation of longer (pppN<sub>5</sub>, pppN<sub>6</sub>) substrates  
466 (SI Fig. 23). This suggests that the P10 domain forms functionally important contacts  
467 with the primer-template duplex extending at least 4 nucleotides downstream from the  
468 primer 3' end and the ligation junction. Indeed, our model positions P10 and specifically  
469 U135, G136 & A137 (Fig. 12, SI Fig. 19) in close proximity to the triplet substrate bound  
470 to template poised for interaction with the shallow groove (Fig. 6).  
471

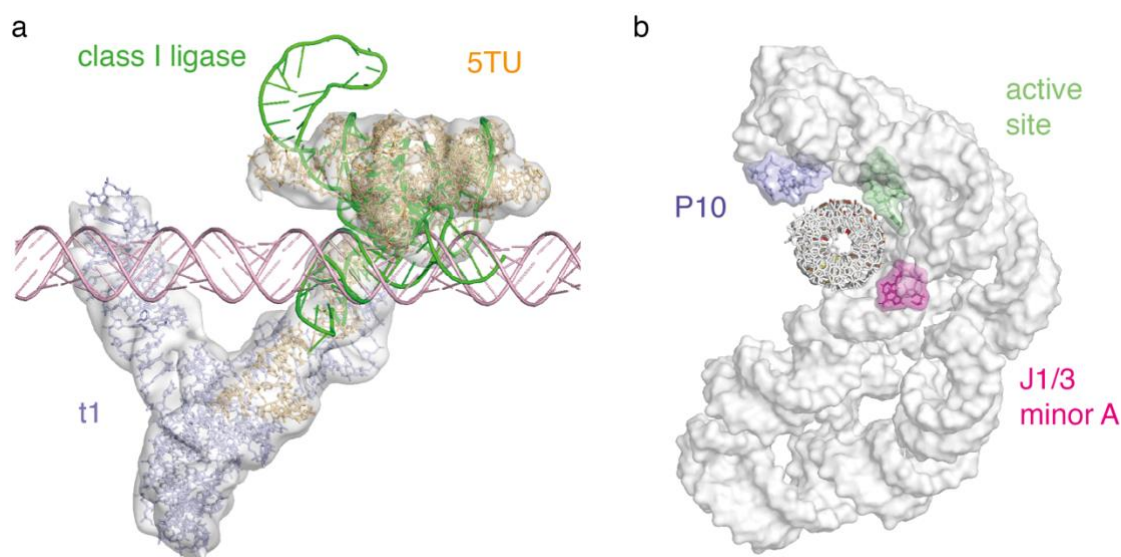

472  
473 **Figure 6. Structural model of the TPR holo-enzyme from alignments to the class**  
474 **I ligase.** (a) TPR model (5TU (orange), t1 (blue)) fitted into contour map with best fit  
475 alignment of class I ligase structure (and extruding U1A binding loop) (green ribbon)  
476 and an idealized double-stranded RNA template (pink) aligned to class I substrate helix.  
477 (b) Side of space-filling TPR model with idealized double-stranded RNA template  
478 (white) and putative contact sites active site (C43 (chartreuse)), J1/3 A-minor  
479 interaction (magenta) and P10 shallow groove interaction (pale blue).  
480

481 Another remarkable feature of the TPR is its capacity to support non-canonical  
482 RNA synthesis modes such as triplet polymerization in the reverse 3'-5' direction<sup>11</sup>.  
483 Analysis of the 3'-5' mode of templated RNA synthesis by the TPR using deep  
484 sequencing (FidelitySeq, SI Fig. 24) suggests that - in contrast to the 5'-3' reaction -  
485 fidelity is reduced to 84%, even below the baseline fidelity of 5'-3' synthesis in the  
486 absence of the P10 domain (SI Fig. 25). Although the measured 3'-5' error rate may  
487 be both sequence-dependent and inflated by non-ribozyme derived errors from the  
488 sequencing workflow due to poor incorporation AU-rich triplets (SI Fig. 26), it is clear

489 that TPR fidelity is significantly reduced for 3'-5' compared to 5'-3' synthesis. This loss  
490 of fidelity can now be rationalized in the light of our holoenzyme model as in the reverse  
491 3'-5' mode (with the triplet triphosphate moiety positioned in the active site) P10 can  
492 neither interact with (nor stabilize) the substrate triplet, but instead is positioned to  
493 interact with the upstream (3') primer with no impact on triplet incorporation (SI Fig.  
494 27).

495

#### 496 ***Evolution of a mutualistic heterodimer***

497 The structure of the 5TU+t1 TPR comprising a catalytic (5TU) and non-catalytic (t1)  
498 subunit (derived from the same progenitor) has interesting analogies with  
499 proteinaceous polymerases such as the HIV reverse transcriptase (RT) holoenzyme  
500 heterodimer. In HIV RT the non-catalytic p55 subunit appears to aid activity of the  
501 catalytic p65 subunit by positioning the primer/template duplex for optimal processive  
502 synthesis (SI Fig. 28). It is tempting to speculate that the non-catalytic t1 RNA subunit  
503 may serve a similar function. Indeed, our holoenzyme model (Fig. 6) indicates that  
504 RNA templates of 30 nucleotides (or longer) would be able to interact with t1:P1. From  
505 the 3D variability analysis (SI Movie 1) it is tempting to speculate that the hinge-like  
506 motion of t1:P1 could allow for docking of the template, followed by scanning for the  
507 correct positioning of the ligation junction near the active site.

508 We hypothesize that another role of the t1 accessory subunit may be to pre-  
509 configure 5TU:J1/3 in a conformation that allows for productive template docking.  
510 Indeed, the extended and rigid conformation of the single-stranded J1/3 linker segment  
511 is a noteworthy and unanticipated feature of the TPR structure. J1/3 is of particular  
512 interest because the equivalent positions to 5TU:A22-A24 are implicated in A-minor  
513 interaction with the substrate helix in the cLL structure<sup>13</sup>. By analogy, one might expect  
514 there to be similar interactions in the TPR holoenzyme with the primer-template duplex.  
515 Indeed, our holoenzyme model positions the PT helix in proximity to J1/3 (Fig. 6, SI  
516 Fig. 27). Furthermore, functional data strongly suggests that the extended A-minor  
517 triad conformation (rather than the precise sequence of J1/3) is essential for full TPR  
518 function via enhancement by the t1 subunit. Lengthening or shortening this single-  
519 stranded region by as few as two nucleotides reduces TPR activity to the  $\Delta$ t1 baseline  
520 (SI Fig. 29). Thus the t1 domain and its KL interactions may together serve to hold J1/3  
521 in this out-stretched conformation, as a longer or untethered single-stranded template-  
522 binding strand would likely be more dynamic and adopt a variety of conformations,  
523 increasing the entropic cost of template interaction. Analysis of the evolution of the  
524 related 52-2 polymerase ribozyme (which used NTPs as substrates)<sup>7</sup> suggest the  
525 emergence of a pseudoknot structure involving P7 and the J1/3 equivalent, which

526 might enhance PR activity via a similar restriction of the conformational freedom of this  
527 crucial sequence segment.

528 The TPR structure also reveals a number of RNA motifs not previously  
529 encountered. For example, the U-turn motif at t1:J2/3 appears to be a unique motif that  
530 combines a symmetrical incorporation of pyrimidine tracts with two pyrimidine-  
531 pyrimidine base pairs to create a tight turn (Fig. 5c,d). The t1:C34-C99 bp at the apex  
532 of this motif is extremely uncommon, with only 6 previous occurrences in the RNA  
533 structural database<sup>35</sup>. Furthermore, in each of the previous cases the C-C pair is in the  
534 middle of a co-axially stacked helix. NMR studies suggest C-C pairs to be highly mobile,  
535 often switching between one C as the H-bond donor to the acceptor and have been  
536 shown to be critically important for the activity of the HCV IRES<sup>36</sup> as well as the  
537 paromomycin binding motif<sup>37</sup>. Another interesting structural feature is the 5-bp  
538 branched kissing-loop (bKL) that connects 5TU and t1 (KL1, Fig. 3). Much like the 6-  
539 bp designer bKL structures recently described<sup>38</sup>, this bKL is stabilized at its base by a  
540 trans-base stacking interaction (C5-t1:C22). In this case the branched helix (t1:P1) is  
541 further stabilized by a second tertiary interaction with P3, an apparent A-minor insertion.  
542 These A-bulge stabilizations appear to be a common feature of evolved RNA  
543 structures that have yet to be utilized in designer RNA structures. Incorporation of a 5-  
544 bp bKL with t1:J3/2 and accompanying A-minor insertion could offer a new motif for  
545 expansion of the RNA origami architecture<sup>39</sup>.

546 The characterization of this motif also offers a potential explanation for the  
547 emergence of the mutualistic interaction between the catalytic and accessory subunits  
548 during *in vitro* evolution<sup>11</sup>. In the t1 progenitor RNA, the 3' sequence extension  
549 triggered a wholesale reorganization of the tertiary fold, abolishing its catalytic activity.  
550 Serendipitously, this exposed an RNA sequence capable of forming a kissing loop  
551 interaction with all other members of the selection library, which positioned the t1 5'  
552 selection cassette near to the active site of a bound catalytic subunit (5TU / t5  
553 progenitor), allowing for mutualistic exploitation of its activity by t1. Over the course of  
554 the selection experiment, t1 gained further mutations to better associate and co-evolve  
555 with catalytically active subunits, and, in turn, active subunits that could exploit t1  
556 complex formation thrived<sup>11</sup>. Thus, mutualism and eventual molecular symbiosis  
557 between the two subunits may have emerged by co-optation of an RNA parasite.

558 In conclusion, our results describe the structure and comprehensive structure-  
559 function analysis of the 5TU+t1 triplet polymerase ribozyme, a class of ribozyme for  
560 which no previous structures had been described. Our data provide a framework for a  
561 better molecular understanding of polymerase ribozyme function and RNA-catalyzed  
562 RNA replication, an enzymatic activity widely considered to be fundamental for the

563 emergence of life's first genetic system. Finally, our structure reveals structural and  
564 functional motifs with potential for applications in the construction of RNA  
565 nanotechnology objects and devices.

566

567 **Acknowledgements:**

568 We thank our colleague K. Nguyen (MRC LMB) for helpful comments on the  
569 manuscript. The research at iNANO AU was supported by the Independent Research  
570 Fund Denmark (9040-00425B) (EKSM, ESA), the Novo Nordisk Foundation  
571 (NNF21OC0070452) (EKSM, ELK, KH, ESA), a fellowship from the Canadian Natural  
572 Sciences and Engineering Research Council (532417) (EKSM), a Carlsberg  
573 Foundation Research Infrastructure grant (CF20-0635) (ESA), and a Lundbeck  
574 fellowship (R250-2017-1502) (ELK). The research at MRC LMB was supported by the  
575 Medical Research Council, as part of United Kingdom Research and Innovation (also  
576 known as UK Research and Innovation (UKRI)) [MC\_U105178804] (CJKW, EG, IG,  
577 JFC, JA, PH), a grant from the Volkswagen Foundation (96 755) (EG), a Herchel Smith  
578 studentship (2017) (CJKW), a Marie Curie fellowship (H2020-MSCA-IF-2018-845303)  
579 (IG), a Carlsberg fellowship (CF17-0809) (ELK). For the purpose of open access, the  
580 MRC Laboratory of Molecular Biology has applied a CC BY public copyright license to  
581 any Author Accepted Manuscript version arising.

582

583 **References**

584

585 1. Gesteland, R. F., Cech, T. R. & Atkins, J. F. *The RNA World* (Cold Spring Harbor  
586 Laboratory Press, 2005).

587 2. Gilbert, W. Origin of Life - the RNA World. *Nature* **319**, 618-618 (1986).

588 3. Johnston, W. K., Unrau, P. J., Lawrence, M. S., Glasner, M. E. & Bartel, D. P.  
589 RNA-catalyzed RNA polymerization: accurate and general RNA-templated  
590 primer extension. *Science* **292**, 1319-1325 (2001).  
591 <https://doi.org/10.1126/science.1060786>

592 4. Wochner, A., Attwater, J., Coulson, A. & Holliger, P. Ribozyme-catalyzed  
593 transcription of an active ribozyme. *Science* **332**, 209-212 (2011).  
594 <https://doi.org/10.1126/science.1200752>

595 5. Attwater, J., Wochner, A. & Holliger, P. In-ice evolution of RNA polymerase  
596 ribozyme activity. *Nat Chem* **5**, 1011-1018 (2013).  
597 <https://doi.org/10.1038/nchem.1781>

598 6. Horning, D. P. & Joyce, G. F. Amplification of RNA by an RNA polymerase  
599 ribozyme. *Proc Natl Acad Sci U S A* **113**, 9786-9791 (2016).  
600 <https://doi.org/10.1073/pnas.1610103113>

601 7. Portillo, X., Huang, Y. T., Breaker, R. R., Horning, D. P. & Joyce, G. F.  
602 Witnessing the structural evolution of an RNA enzyme. *Elife* **10** (2021).  
603 <https://doi.org/10.7554/eLife.71557>

604 8. Cojocar, R. & Unrau, P. J. Processive RNA polymerization and promoter  
605 recognition in an RNA World. *Science* **371**, 1225+ (2021).  
606 <https://doi.org/10.1126/science.abd9191>

607 9. Tjhung, K. F., Shokhirev, M. N., Horning, D. P. & Joyce, G. F. An RNA  
608 polymerase ribozyme that synthesizes its own ancestor. *Proceedings of the  
609 National Academy of Sciences of the United States of America* **117**, 2906-2913  
610 (2020). <https://doi.org/10.1073/pnas.1914282117>

611 10. Tagami, S., Attwater, J. & Holliger, P. Simple peptides derived from the  
612 ribosomal core potentiate RNA polymerase ribozyme function. *Nature Chemistry*  
613 **9**, 325-332 (2017). <https://doi.org/10.1038/Nchem.2739>

614 11. Attwater, J., Raguram, A., Morgunov, A. S., Gianni, E. & Holliger, P. Ribozyme-  
615 catalysed RNA synthesis using triplet building blocks. *Elife* **7** (2018).  
616 <https://doi.org/10.7554/eLife.35255>

617 12. Bartel, D. P. & Szostak, J. W. Isolation of new ribozymes from a large pool of  
618 random sequences. *Science* **261**, 1411-1418 (1993).  
619 <https://doi.org/10.1126/science.7690155>

- 620 13. Shechner, D. M. *et al.* Crystal Structure of the Catalytic Core of an RNA-  
621 Polymerase Ribozyme. *Science* **326**, 1271-1275 (2009).  
622 <https://doi.org/10.1126/science.1174676>
- 623 14. Shechner, D. M. & Bartel, D. P. The structural basis of RNA-catalyzed RNA  
624 polymerization. *Nature Structural & Molecular Biology* **18**, 1036-U1096 (2011).  
625 <https://doi.org/10.1038/nsmb.2107>
- 626 15. Cech, T. R. The RNA worlds in context. *Cold Spring Harb Perspect Biol* **4**,  
627 a006742 (2012). <https://doi.org/10.1101/cshperspect.a006742>
- 628 16. Zaug, A. J. & Cech, T. R. The Intervening Sequence RNA of Tetrahymena Is an  
629 Enzyme. *Science* **231**, 470-475 (1986). <https://doi.org/10.1126/science.3941911>
- 630 17. Doudna, J. A. & Szostak, J. W. Rna-Catalyzed Synthesis of Complementary-  
631 Strand Rna. *Nature* **339**, 519-522 (1989). <https://doi.org/10.1038/339519a0>
- 632 18. Doudna, J. A., Couture, S. & Szostak, J. W. A Multisubunit Ribozyme That Is a  
633 Catalyst of and Template for Complementary Strand Rna-Synthesis. *Science*  
634 **251**, 1605-1608 (1991). <https://doi.org/10.1126/science.1707185>
- 635 19. Green, R. & Szostak, J. W. Selection of a Ribozyme That Functions as a  
636 Superior Template in a Self-Copying Reaction. *Science* **258**, 1910-1915 (1992).  
637 <https://doi.org/10.1126/science.1470913>
- 638 20. Doudna, J. A., Usman, N. & Szostak, J. W. Ribozyme-Catalyzed Primer  
639 Extension by Trinucleotides - a Model for the Rna-Catalyzed Replication of Rna.  
640 *Biochemistry* **32**, 2111-2115 (1993). <https://doi.org/10.1021/bi00059a032>
- 641 21. Eklund, E. H. & Bartel, D. P. RNA-catalysed RNA polymerization using  
642 nucleoside triphosphates. *Nature* **382**, 373-376 (1996).  
643 <https://doi.org/10.1038/382373a0>
- 644 22. Kristoffersen, E. L., Burman, M., Noy, A. & Holliger, P. Rolling circle RNA  
645 synthesis catalyzed by RNA. *Elife* **11** (2022). <https://doi.org/10.7554/eLife.75186>
- 646 23. Kappel, K. *et al.* De novo computational RNA modeling into cryo-EM maps of  
647 large ribonucleoprotein complexes. *Nature Methods* **15**, 947-+ (2018).  
648 <https://doi.org/10.1038/s41592-018-0172-2>
- 649 24. Kappel, K. *et al.* Accelerated cryo-EM-guided determination of three-dimensional  
650 RNA-only structures. *Nat Methods* **17**, 698-+ (2020).  
651 <https://doi.org/10.1038/s41592-020-0878-9>
- 652 25. Attwater, J., Wochner, A., Pinheiro, V. B., Coulson, A. & Holliger, P. Ice as a  
653 protocellular medium for RNA replication. *Nature Communications* **1**, 76 (2010).  
654 <https://doi.org/10.1038/ncomms1076>

- 655 26. Russo, C. J. & Passmore, L. A. Electron microscopy: Ultrastable gold substrates  
656 for electron cryomicroscopy. *Science* **346**, 1377-1380 (2014).  
657 <https://doi.org/10.1126/science.1259530>
- 658 27. Punjani, A., Zhang, H. & Fleet, D. J. Non-uniform refinement: adaptive  
659 regularization improves single-particle cryo-EM reconstruction. *Nat Methods* **17**,  
660 1214-1221 (2020). <https://doi.org/10.1038/s41592-020-00990-8>
- 661 28. Pitt, J. N. & Ferre-D'Amare, A. R. Rapid construction of empirical RNA fitness  
662 landscapes. *Science* **330**, 376-379 (2010).  
663 <https://doi.org/10.1126/science.1192001>
- 664 29. Jimenez, J. I., Xulvi-Brunet, R., Campbell, G. W., Turk-MacLeod, R. & Chen, I. A.  
665 Comprehensive experimental fitness landscape and evolutionary network for  
666 small RNA. *Proc Natl Acad Sci U S A* **110**, 14984-14989 (2013).  
667 <https://doi.org/10.1073/pnas.1307604110>
- 668 30. Li, C., Qian, W. F., Maclean, C. J. & Zhang, J. Z. The fitness landscape of a  
669 tRNA gene. *Science* **352**, 837-840 (2016).  
670 <https://doi.org/10.1126/science.aae0568>
- 671 31. Puchta, O. *et al.* Network of epistatic interactions within a yeast snoRNA.  
672 *Science* **352**, 840-844 (2016). <https://doi.org/10.1126/science.aaf0965>
- 673 32. Liu, D. *et al.* Branched kissing loops for the construction of diverse RNA  
674 homooligomeric nanostructures. *Nat Chem* **12**, 249-259 (2020).  
675 <https://doi.org/10.1038/s41557-019-0406-7>
- 676 33. Bou-Nader, C. & Zhang, J. Structural Insights into RNA Dimerization: Motifs,  
677 Interfaces and Functions. *Molecules* **25** (2020).  
678 <https://doi.org/10.3390/molecules25122881>
- 679 34. Kim, C. H. & Tinoco, I., Jr. A retroviral RNA kissing complex containing only two  
680 G.C base pairs. *Proc Natl Acad Sci U S A* **97**, 9396-9401 (2000).  
681 <https://doi.org/10.1073/pnas.170283697>
- 682 35. Narayanan, B. C. *et al.* The Nucleic Acid Database: new features and  
683 capabilities. *Nucleic Acids Research* **42**, D114-D122 (2014).  
684 <https://doi.org/10.1093/nar/gkt980>
- 685 36. Collier, A. J. *et al.* A conserved RNA structure within the HCVIRES eIF3-binding  
686 site. *Nature Structural Biology* **9**, 375-380 (2002). <https://doi.org/10.1038/nsb785>
- 687 37. Tavares, T. J., Beribisky, A. V. & Johnson, P. E. Structure of the cytosine-  
688 cytosine mismatch in the thymidylate synthase mRNA binding site and analysis  
689 of its interaction with the aminoglycoside paromomycin. *Rna* **15**, 911-922 (2009).  
690 <https://doi.org/10.1261/rna.1514909>



- 691 38. Liu, D., Shao, Y. M., Piccirilli, J. A. & Weizmann, Y. Structures of artificially  
692 designed discrete RNA nanoarchitectures at near-atomic resolution. *Science*  
693 *Advances* **7** (2021). <https://doi.org/10.1126/sciadv.abf4459>
- 694 39. Geary, C., Grossi, G., McRae, E. K. S., Rothmund, P. W. K. & Andersen, E. S.  
695 RNA origami design tools enable cotranscriptional folding of kilobase-sized  
696 nanoscaffolds. *Nat Chem* **13**, 549-558 (2021). [https://doi.org/10.1038/s41557-](https://doi.org/10.1038/s41557-021-00679-1)  
697 [021-00679-1](https://doi.org/10.1038/s41557-021-00679-1)  
698  
699
